# Supplementary material
Source: MDPI journal article supplement (https://www.mdpi.com/2073-4441/13/24/3563)
Supplement: s1 [file s1]

## Supplementary material

*Table S1: Average pore diameter ( $\mu\text{m}$ ), suture elevation, identifications with SEM and stereomicroscope approaches for the 273 individuals randomly selected and analysable*

| Individual | Suture elevation | Relative pore diameter | Pore diameter ( $\mu\text{m}$ ) | SEM identification | Binocular identification |
|------------|------------------|------------------------|---------------------------------|--------------------|--------------------------|
| 1          | flush            | small                  | 1,30                            | T2                 | T2                       |
| 2          | flush            | small                  | 1,12                            | T2                 | T6                       |
| 3          | flush            | small                  | 1,24                            | T2                 | T6                       |
| 4          | flush            | big                    | 1,95                            | T6                 | T6                       |
| 6          | flush            | big                    | 1,69                            | T6                 | T6                       |
| 7          | flush            | big                    | 1,94                            | T6                 | T6                       |
| 8          | flush            | big                    | 1,67                            | T6                 | T6                       |
| 9          | flush            | big                    | 3,14                            | T6                 | T6                       |
| 10         | flush            | small                  | 1,35                            | T2                 | T2                       |
| 11         | flush            | big                    | 1,89                            | T6                 | T6                       |
| 13         | flush            | big                    | 2,02                            | T6                 | T6                       |
| 14         | flush            | big                    | 1,96                            | T6                 | T6                       |
| 15         | flush            | big                    | 2,79                            | T6                 | T6                       |
| 16         | flush            | big                    | 1,88                            | T6                 | T2                       |
| 17         | flush            | big                    | 1,52                            | T6                 | T6                       |
| 18         | flush            | big                    | 2,25                            | T6                 | T6                       |
| 19         | flush            | big                    | 2,01                            | T6                 | T2                       |
| 20         | flush            | big                    | 1,88                            | T6                 | T6                       |
| 21         | flush            | big                    | 1,78                            | T6                 | T6                       |
| 22         | flush            | big                    | 1,85                            | T6                 | T6                       |
| 23         | flush            | big                    | 2,32                            | T6                 | T6                       |
| 24         | flush            | big                    | 2,33                            | T6                 | T6                       |
| 25         | flush            | big                    | 1,94                            | T6                 | T2                       |
| 26         | flush            | big                    | 1,76                            | T6                 | T1                       |
| 27         | flush            | big                    | 2,11                            | T6                 | T6                       |
| 28         | flush            | big                    | 1,86                            | T6                 | T6                       |
| 29         | flush            | big                    | 1,54                            | T6                 | T6                       |
| 31         | flush            | big                    | 1,93                            | T6                 | T1                       |
| 32         | flush            | big                    | 1,96                            | T6                 | T2                       |
| 33         | flush            | big                    | 2,46                            | T6                 | T6                       |
| 34         | flush            | small                  | 1,07                            | T2                 | T2                       |
| 35         | flush            | big                    | 1,84                            | T6                 | T6                       |
| 36         | flush            | big                    | 2,44                            | T6                 | T6                       |
| 37         | flush            | big                    | 1,66                            | T6                 | T2                       |
| 38         | flush            | big                    | 2,45                            | T6                 | T6                       |
| 39         | flush            | big                    | 2,16                            | T6                 | T6                       |
| 40         | flush            | big                    | 1,61                            | T6                 | T6                       |
| 41         | flush            | small                  | 1,23                            | T2                 | T2                       |
| 42         | flush            | big                    | 1,87                            | T6                 | T6                       |
| 43         | flush            | big                    | 2,11                            | T6                 | T6                       |
| 44         | flush            | big                    | 1,97                            | T6                 | T6                       |
| 45         | flush            | big                    | 1,77                            | T6                 | T6                       |
| 46         | flush            | big                    | 1,59                            | T6                 | T1                       |
| 48         | flush            | big                    | 2,23                            | T6                 | T6                       |
| 49         | flush            | big                    | 1,81                            | T6                 | T6                       |
| 51         | flush            | big                    | 2,33                            | T6                 | T6                       |
| 52         | flush            | big                    | 1,52                            | T6                 | T6                       |
| 53         | flush            | big                    | 1,44                            | T6                 | T6                       |
| 54         | flush            | big                    | 1,71                            | T6                 | T6                       |
| 55         | flush            | big                    | 1,58                            | T6                 | T6                       |
| 56         | flush            | big                    | 1,67                            | T6                 | T6                       |
| 57         | flush            | big                    | 2,07                            | T6                 | T6                       |
| 58         | flush            | big                    | 1,55                            | T6                 | T6                       |
| 59         | flush            | big                    | 1,71                            | T6                 | T6                       |
| 60         | flush            | big                    | 1,57                            | T6                 | T6                       |
| 61         | flush            | big                    | 2,29                            | T6                 | T6                       |
| 63         | flush            | big                    | 1,99                            | T6                 | T6                       |
| 64         | flush            | big                    | 1,63                            | T6                 | T6                       |
| 65         | flush            | big                    | 2,05                            | T6                 | T6                       |
| 66         | flush            | big                    | 2,16                            | T6                 | T6                       |
| 67         | flush            | big                    | 1,52                            | T6                 | T6                       |
| 68         | flush            | big                    | 2,10                            | T6                 | T6                       |
| 69         | flush            | big                    | 1,97                            | T6                 | T6                       |
| 70         | flush            | big                    | 1,43                            | T6                 | T2                       |
| 71         | flush            | big                    | 1,82                            | T6                 | T6                       |
| 72         | flush            | big                    | 1,54                            | T6                 | T6                       |
| 74         | flush            | big                    | 1,53                            | T6                 | T6                       |
| 75         | flush            | big                    | 1,53                            | T6                 | T1                       |
| 76         | flush            | big                    | 1,44                            | T6                 | T6                       |
| 77         | flush            | big                    | 1,90                            | T6                 | T6                       |
| 78         | flush            | big                    | 2,01                            | T6                 | T6                       |
| 79         | flush            | big                    | 1,68                            | T6                 | T6                       |

|     |        |       |      |    |    |
|-----|--------|-------|------|----|----|
| 80  | flush  | big   | 1,69 | T6 | T2 |
| 81  | flush  | big   | 1,73 | T6 | T6 |
| 82  | flush  | big   | 2,28 | T6 | T1 |
| 83  | flush  | big   | 1,82 | T6 | T6 |
| 84  | flush  | big   | 1,85 | T6 | T1 |
| 85  | flush  | small | 1,28 | T2 | T6 |
| 86  | flush  | big   | 1,84 | T6 | T6 |
| 87  | flush  | big   | 2,00 | T6 | T1 |
| 88  | flush  | big   | 1,79 | T6 | T6 |
| 89  | flush  | small | 1,31 | T2 | T1 |
| 90  | flush  | big   | 1,89 | T6 | T2 |
| 91  | flush  | big   | 2,11 | T6 | T6 |
| 92  | flush  | small | 0,94 | T2 | T6 |
| 93  | flush  | big   | 1,84 | T6 | T6 |
| 94  | flush  | big   | 1,63 | T6 | T6 |
| 95  | flush  | small | 1,31 | T2 | T1 |
| 97  | flush  | small | 1,04 | T2 | T2 |
| 98  | flush  | big   | 2,11 | T6 | T6 |
| 99  | flush  | small | 1,23 | T2 | T2 |
| 100 | flush  | small | 1,14 | T2 | T6 |
| 101 | flush  | small | 1,18 | T2 | T1 |
| 102 | flush  | small | 0,85 | T2 | T2 |
| 103 | flush  | small | 1,35 | T2 | T1 |
| 105 | flush  | big   | 1,99 | T6 | T6 |
| 107 | flush  | small | 0,66 | T2 | T2 |
| 108 | flush  | big   | 1,54 | T6 | T6 |
| 109 | flush  | small | 0,94 | T2 | T1 |
| 110 | flush  | big   | 1,56 | T6 | T6 |
| 111 | flush  | big   | 1,57 | T6 | T6 |
| 112 | flush  | small | 1,18 | T2 | T6 |
| 113 | flush  | big   | 1,60 | T6 | T1 |
| 114 | flush  | small | 0,93 | T2 | T2 |
| 115 | flush  | big   | 2,03 | T6 | T6 |
| 116 | flush  | big   | 1,87 | T6 | T6 |
| 117 | flush  | big   | 1,67 | T6 | T6 |
| 118 | flush  | small | 1,33 | T2 | T6 |
| 119 | flush  | big   | 1,46 | T6 | T2 |
| 120 | flush  | big   | 1,50 | T6 | T6 |
| 121 | flush  | small | 0,79 | T2 | T2 |
| 122 | flush  | small | 0,86 | T2 | T6 |
| 123 | flush  | big   | 1,61 | T6 | T2 |
| 124 | flush  | small | 1,20 | T2 | T2 |
| 125 | flush  | small | 1,19 | T2 | T6 |
| 126 | flush  | small | 1,04 | T2 | T1 |
| 127 | flush  | small | 1,09 | T2 | T1 |
| 128 | flush  | small | 1,29 | T2 | T6 |
| 129 | flush  | small | 1,14 | T2 | T6 |
| 130 | flush  | big   | 1,64 | T6 | T2 |
| 131 | flush  | small | 0,87 | T2 | T6 |
| 132 | flush  | big   | 1,66 | T6 | T6 |
| 133 | flush  | big   | 1,43 | T6 | T2 |
| 134 | flush  | small | 1,33 | T2 | T2 |
| 135 | flush  | big   | 1,89 | T6 | T6 |
| 137 | flush  | big   | 1,47 | T6 | T2 |
| 139 | flush  | small | 1,10 | T2 | T6 |
| 140 | flush  | small | 1,08 | T2 | T6 |
| 142 | flush  | small | 1,29 | T2 | T2 |
| 143 | flush  | big   | 1,58 | T6 | T6 |
| 144 | flush  | big   | 2,01 | T6 | T1 |
| 146 | flush  | small | 0,86 | T2 | T6 |
| 147 | flush  | small | 0,93 | T2 | T6 |
| 148 | flush  | small | 0,66 | T2 | T2 |
| 149 | flush  | small | 1,34 | T2 | T2 |
| 150 | flush  | small | 1,23 | T2 | T1 |
| 151 | flush  | small | 0,88 | T2 | T6 |
| 152 | flush  | small | 1,14 | T2 | T6 |
| 153 | flush  | small | 0,92 | T2 | T1 |
| 154 | flush  | small | 1,33 | T2 | T6 |
| 155 | flush  | big   | 1,74 | T6 | T6 |
| 156 | flush  | big   | 2,05 | T6 | T6 |
| 157 | flush  | big   | 1,98 | T6 | T2 |
| 158 | flush  | small | 1,40 | T2 | T1 |
| 159 | flush  | big   | 2,21 | T6 | T1 |
| 160 | flush  | big   | 1,60 | T6 | T2 |
| 161 | flush  | big   | 1,59 | T6 | T6 |
| 162 | flush  | big   | 1,90 | T6 | T6 |
| 163 | flush  | big   | 1,93 | T6 | T6 |
| 164 | flush  | big   | 1,77 | T6 | T6 |
| 165 | raised | big   | 1,56 | T1 | T1 |
| 166 | flush  | small | 1,28 | T2 | T6 |

|     |       |       |      |    |    |
|-----|-------|-------|------|----|----|
| 167 | flush | big   | 1,84 | T6 | T6 |
| 168 | flush | big   | 1,75 | T6 | T6 |
| 169 | flush | small | 1,13 | T2 | T1 |
| 170 | flush | big   | 1,85 | T6 | T6 |
| 171 | flush | big   | 1,52 | T6 | T6 |
| 172 | flush | big   | 1,53 | T6 | T6 |
| 173 | flush | big   | 1,71 | T6 | T6 |
| 174 | flush | big   | 1,65 | T6 | T6 |
| 175 | flush | big   | 2,12 | T6 | T6 |
| 176 | flush | big   | 1,42 | T6 | T6 |
| 177 | flush | big   | 1,58 | T6 | T2 |
| 178 | flush | big   | 2,13 | T6 | T6 |
| 179 | flush | big   | 1,56 | T6 | T6 |
| 180 | flush | small | 1,04 | T2 | T1 |
| 181 | flush | big   | 1,90 | T6 | T6 |
| 182 | flush | big   | 1,53 | T6 | T6 |
| 183 | flush | small | 1,32 | T2 | T6 |
| 184 | flush | big   | 1,49 | T6 | T6 |
| 185 | flush | big   | 2,03 | T6 | T6 |
| 186 | flush | big   | 2,20 | T6 | T6 |
| 187 | flush | big   | 1,85 | T6 | T6 |
| 188 | flush | small | 1,16 | T2 | T1 |
| 190 | flush | big   | 2,30 | T6 | T6 |
| 191 | flush | small | 1,18 | T2 | T6 |
| 192 | flush | big   | 1,79 | T6 | T6 |
| 193 | flush | big   | 1,53 | T6 | T6 |
| 194 | flush | small | 1,03 | T2 | T6 |
| 195 | flush | small | 1,17 | T2 | T1 |
| 196 | flush | small | 1,31 | T2 | T6 |
| 197 | flush | big   | 1,58 | T6 | T6 |
| 198 | flush | small | 1,35 | T2 | T6 |
| 199 | flush | big   | 2,31 | T6 | T6 |
| 200 | flush | small | 1,16 | T2 | T1 |
| 201 | flush | big   | 1,75 | T6 | T6 |
| 202 | flush | small | 1,31 | T2 | T6 |
| 203 | flush | small | 0,88 | T2 | T6 |
| 204 | flush | big   | 1,54 | T6 | T6 |
| 205 | flush | big   | 1,55 | T6 | T1 |
| 206 | flush | small | 1,32 | T2 | T2 |
| 207 | flush | big   | 1,52 | T6 | T2 |
| 208 | flush | big   | 1,53 | T6 | T6 |
| 209 | flush | small | 1,16 | T2 | T2 |
| 210 | flush | big   | 1,58 | T6 | T2 |
| 211 | flush | small | 1,20 | T2 | T6 |
| 212 | flush | big   | 1,60 | T6 | T6 |
| 213 | flush | small | 1,13 | T2 | T6 |
| 214 | flush | big   | 1,78 | T6 | T6 |
| 215 | flush | big   | 1,53 | T6 | T6 |
| 216 | flush | big   | 1,53 | T6 | T2 |
| 217 | flush | small | 0,95 | T2 | T6 |
| 218 | flush | small | 1,12 | T2 | T1 |
| 219 | flush | big   | 1,69 | T6 | T2 |
| 220 | flush | small | 1,06 | T2 | T1 |
| 221 | flush | small | 1,08 | T2 | T1 |
| 222 | flush | small | 0,69 | T2 | T2 |
| 223 | flush | small | 0,96 | T2 | T6 |
| 224 | flush | small | 0,82 | T2 | T6 |
| 225 | flush | small | 1,31 | T2 | T6 |
| 226 | flush | big   | 1,81 | T6 | T6 |
| 227 | flush | big   | 1,61 | T6 | T6 |
| 228 | flush | big   | 1,81 | T6 | T2 |
| 229 | flush | small | 1,31 | T2 | T6 |
| 231 | flush | small | 1,20 | T2 | T6 |
| 232 | flush | small | 1,26 | T2 | T6 |
| 233 | flush | big   | 1,60 | T6 | T6 |
| 234 | flush | big   | 1,58 | T6 | T6 |
| 235 | flush | big   | 2,05 | T6 | T6 |
| 236 | flush | small | 1,13 | T2 | T2 |
| 237 | flush | big   | 1,86 | T6 | T6 |
| 240 | flush | big   | 2,46 | T6 | T6 |
| 241 | flush | small | 1,12 | T2 | T6 |
| 242 | flush | small | 1,26 | T2 | T1 |
| 243 | flush | small | 1,11 | T2 | T2 |
| 244 | flush | big   | 1,55 | T6 | T6 |
| 245 | flush | big   | 1,70 | T6 | T6 |
| 246 | flush | big   | 1,58 | T6 | T6 |
| 248 | flush | small | 1,36 | T2 | T2 |
| 251 | flush | big   | 2,50 | T6 | T6 |
| 252 | flush | big   | 2,02 | T6 | T6 |
| 253 | flush | big   | 1,56 | T6 | T6 |

|     |        |       |      |    |    |
|-----|--------|-------|------|----|----|
| 254 | flush  | big   | 2,10 | T6 | T6 |
| 255 | flush  | big   | 1,60 | T6 | T1 |
| 256 | flush  | big   | 2,09 | T6 | T6 |
| 257 | flush  | big   | 1,70 | T6 | T6 |
| 258 | flush  | big   | 2,48 | T6 | T6 |
| 259 | flush  | small | 1,32 | T2 | T6 |
| 260 | flush  | small | 1,07 | T2 | T1 |
| 262 | flush  | big   | 2,04 | T6 | T6 |
| 263 | flush  | big   | 2,20 | T6 | T6 |
| 264 | flush  | big   | 2,03 | T6 | T6 |
| 265 | flush  | big   | 1,66 | T6 | T2 |
| 267 | flush  | big   | 2,11 | T6 | T6 |
| 268 | flush  | small | 1,32 | T2 | T6 |
| 269 | flush  | big   | 2,00 | T6 | T6 |
| 271 | flush  | big   | 1,50 | T6 | T2 |
| 272 | flush  | big   | 2,63 | T6 | T6 |
| 273 | flush  | small | 1,33 | T2 | T6 |
| 274 | flush  | big   | 1,50 | T6 | T6 |
| 275 | flush  | big   | 1,54 | T6 | T2 |
| 276 | flush  | big   | 1,70 | T6 | T6 |
| 277 | flush  | big   | 1,68 | T6 | T6 |
| 278 | raised | big   | 2,01 | T1 | T6 |
| 279 | flush  | small | 1,21 | T2 | T2 |
| 280 | flush  | big   | 1,67 | T6 | T2 |
| 281 | flush  | big   | 1,84 | T6 | T6 |
| 282 | flush  | big   | 1,89 | T6 | T6 |
| 283 | flush  | big   | 1,63 | T6 | T6 |
| 284 | flush  | big   | 1,78 | T6 | T6 |
| 286 | flush  | big   | 1,65 | T6 | T6 |
| 287 | flush  | big   | 2,09 | T6 | T6 |
| 288 | flush  | small | 1,23 | T2 | T2 |
| 289 | flush  | big   | 1,86 | T6 | T6 |
| 290 | flush  | small | 1,34 | T2 | T6 |
| 291 | raised | big   | 1,80 | T1 | T1 |
| 292 | flush  | small | 1,33 | T2 | T2 |
| 293 | flush  | big   | 1,57 | T6 | T6 |
| 294 | flush  | big   | 1,54 | T6 | T6 |
| 295 | flush  | small | 0,95 | T2 | T2 |
| 296 | raised | small | 1,06 | T2 | T6 |
| 297 | flush  | small | 1,14 | T2 | T6 |
| 300 | flush  | small | 1,23 | T2 | T6 |
